# Supplementary material for: Effect of Continuous Feeding of Ayu-Narezushi on Lipid Metabolism in a Mouse Model of Metabolic Syndrome
Source: Hindawi journal article supplement (doi:10.1155/2021/1583154), 2021-09-06
Supplement: f1 [file 1583154.f1.pdf]

Table S1: Microbial count, Organic acids, and Free amino acids of *ayu-narezushi* ripened. The data have been excerpted from Nomura et al. (12) Amino acids had not been distinguished between L- and D-Amino acids in the manuscript.

|                          |                      | Ripening periods (Days) |                   |                   |                   |                   |                   |                   |
|--------------------------|----------------------|-------------------------|-------------------|-------------------|-------------------|-------------------|-------------------|-------------------|
|                          |                      | 0 (Brined fish)         | 8                 | 15                | 22                | 30                | 40                | 60                |
| Microbial counts (cfu/g) | Lactic acid bacteria | $1.9 \times 10^5$       | $9.8 \times 10^7$ | $3.2 \times 10^8$ | $4.3 \times 10^8$ | $3.2 \times 10^8$ | $1.8 \times 10^8$ | $3.7 \times 10^7$ |
| Organic acid (mg/100g)   | Lactic acid          | 195                     | 1435              | 2206              | 2443              | 2409              | 2826              | 3114              |
|                          | Acetic acid          | 0                       | 84                | 116               | 163               | 190               | 235               | 192               |
|                          | Succinic acid        | 0                       | 30                | 39                | 41                | 35                | 44                | 47                |
|                          | Pyruvic acid         | 0                       | 180               | 202               | 236               | 217               | 34                | 41                |
|                          | Formic acid          | 0                       | 69                | 63                | 59                | 45                | 46                | 53                |
| Amino acid (mg/100g)     | Taurine              | 112                     | 27                | 33                | 38                | 33                | 35                | 32                |
|                          | Aspartic acid        | 15                      | 13                | 34                | 12                | 50                | 68                | 83                |
|                          | Threonine            | 11                      | 15                | 31                | 45                | 39                | 47                | 54                |
|                          | Serine               | 19                      | 7                 | 16                | 28                | 29                | 36                | 48                |
|                          | Asparagine           | N.D.                    | 7                 | 14                | 22                | 20                | 27                | 31                |
|                          | Glutamic acid        | 22                      | 41                | 99                | 131               | 118               | 154               | 173               |
|                          | Glutamine            | 5                       | 4                 | 8                 | 15                | 14                | 20                | 24                |
|                          | Glycine              | 28                      | 16                | 31                | 38                | 36                | 46                | 52                |
|                          | Alanine              | 27                      | 25                | 60                | 76                | 60                | 82                | 84                |
|                          | Valine               | 13                      | 17                | 39                | 49                | 42                | 53                | 57                |
|                          | Methionine           | 8                       | 18                | 33                | 49                | 43                | 49                | 53                |
|                          | Proline              | 10                      | 6                 | 12                | 17                | 15                | 17                | 13                |
|                          | Arginine             | 7                       | 8                 | 8                 | 19                | 8                 | 3                 | 4                 |
|                          | Lysine               | 28                      | 32                | 61                | 81                | 77                | 97                | 102               |
|                          | Histidine            | 10                      | 7                 | 11                | 13                | 13                | 18                | 21                |
|                          | Isoleucine           | 8                       | 19                | 40                | 57                | 51                | 60                | 62                |
|                          | Leucine              | 16                      | 46                | 86                | 123               | 108               | 127               | 137               |
|                          | Tyrosine             | 18                      | 10                | 20                | 38                | 32                | 43                | 44                |
|                          | Phenylalanine        | 10                      | 22                | 40                | 56                | 50                | 60                | 72                |
|                          | GABA                 | 0                       | 1                 | 2                 | 3                 | 4                 | 4                 | 3                 |
| Tryptophan               | N.D.                 | N.D.                    | N.D.              | 11                | 11                | 13                | N.D.              |                   |

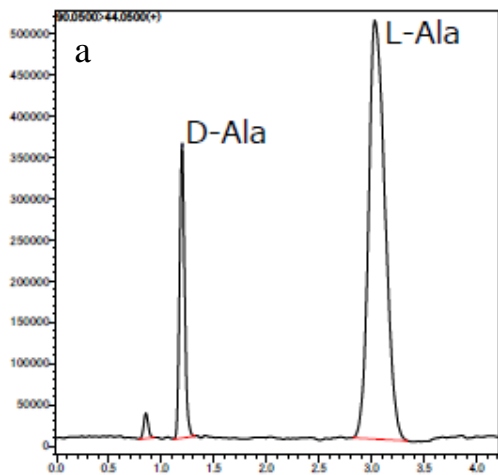

Ala

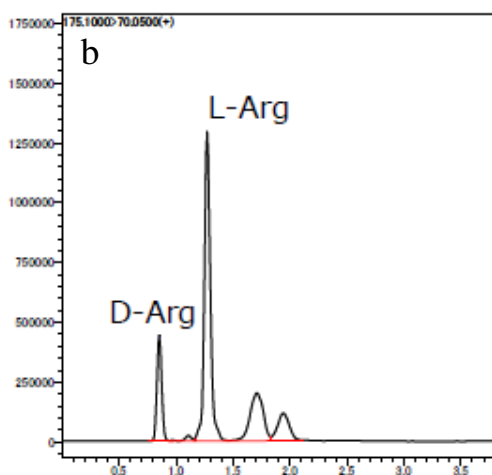

Arg

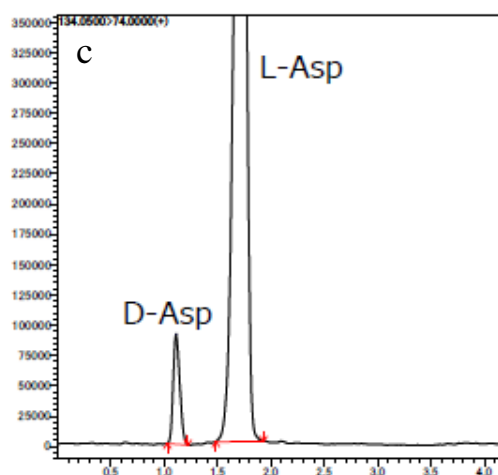

Asp

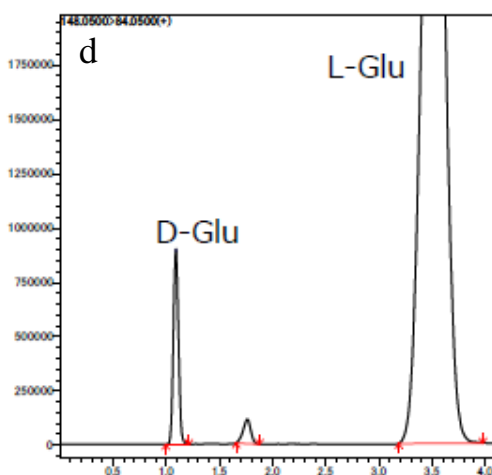

Glu

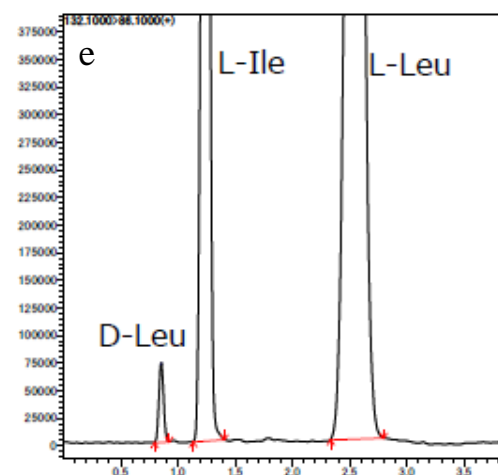

Leu

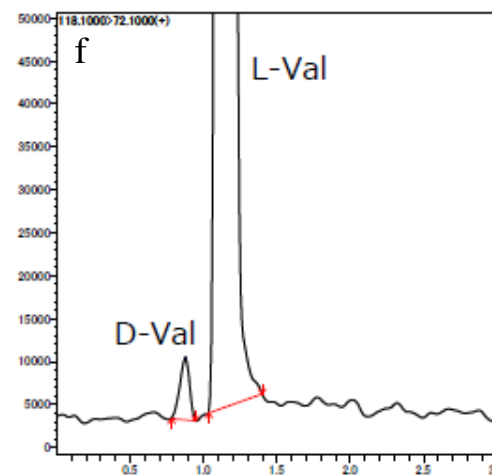

Val

Figure S1: The chromatograms of 6 kinds of D-amino acids detected in *ayu-narezushi*. a: Alanine, b: Arginine, c: Aspartic Acid, d: Glutamic Acid, e: Leucine, f: Valine.
